# Supplementary material for: Fully Flexible Docking of Medium Sized Ligand Libraries with RosettaLigand
Source: PubMed Central journal article supplement (PMC4514752; doi:10.1371/journal.pone.0132508), 2015-07-24

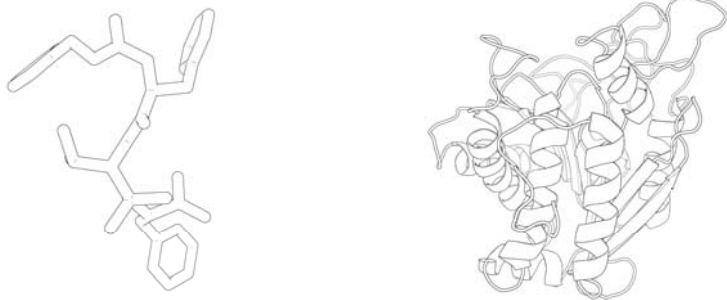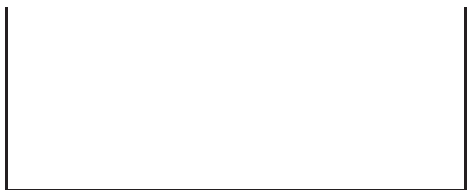

Grid Manager

updates  
score evals

Grid Score

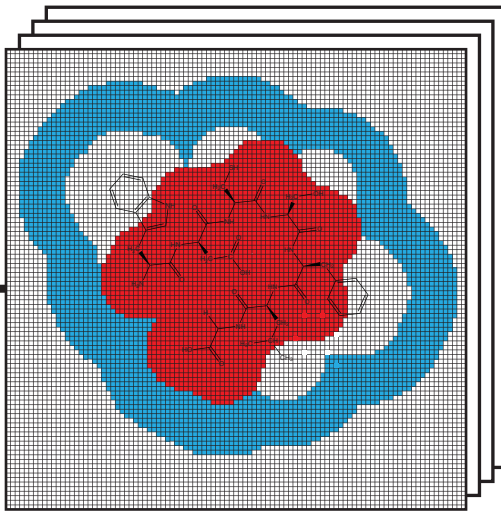

Supplement: pone.0132508.s001.pdf [file pone.0132508.s001.pdf]
