# Supplementary material for: Fully Flexible Docking of Medium Sized Ligand Libraries with RosettaLigand
Source: PubMed Central journal article supplement (PMC4514752; doi:10.1371/journal.pone.0132508), 2015-07-24
Supplement: pone.0132508.s007.pdf [file pone.0132508.s007.pdf]

| PDB ID | Ligand ID | Ligand Formula              | Protein name                                         | Ligand Name                                                                                              | $\log(K_i)$ | Weight  | AA Count | Citation                           |
|--------|-----------|-----------------------------|------------------------------------------------------|----------------------------------------------------------------------------------------------------------|-------------|---------|----------|------------------------------------|
| 2q89   | 6CS       | $C_6H_{10}N_6O_3$           | putative abc transporter amino acid-binding protein  | (4s,5s)-5-hydroxy-2-methyl-1,4,5,6-tetrahydropyrimidine-4-carboxylic acid                                | 6.3         | 158.155 | 257      | {Hanekep et al., 2007}             |
| 8bgz   | VX3       | $C_{21}H_{15}NO_2$          | proto-oncogene serine/threonine-protein kinase pim-1 | 2,3-diphenyl-1h-indole-7-carboxylic acid                                                                 | 6.26        | 313.349 | 333      | {Pierce et al., 2008}              |
| 1ukb   | BEZ       | $C_8H_6O_2$                 | 2-hydroxy-6-oxo-7-methylocta-2,4-dienoate hydrolase  | benzoic acid                                                                                             | 3.19        | 122.121 | 282      | {Fushinobu et al., 2005}           |
| 1vot   | HUP       | $C_{15}H_{18}N_2O$          | acetylcholinesterase                                 | huperzine a                                                                                              | 6.6         | 242.316 | 537      | {Raves et al., 1997}               |
| 2p7g   | 2OH       | $C_{15}H_{16}O_2$           | estrogen-related receptor gamma                      | 4,4'-propane-2,2-diylidiphenol                                                                           | 6.53        | 228.286 | 251      | {Abad et al., 2008}                |
| 2rea   | GLY       | $C_2H_5NO_2$                | glutamate [mnda] receptor subunit 3b                 | Glycine                                                                                                  | 7.79        | 75.066  | 584      | {Yao et al., 2008}                 |
| 2vak   | P83       | $C_{16}H_{16}N_2$           | cellular tumor antigen p53                           | 1-(9-ethyl-9h-carbazol-3-yl)-n-methylmethanamine                                                         | 3.82        | 238.328 | 438      | {Boeckler et al., 2008}            |
| 2nta   | 521       | $C_{12}H_6ClN_2O_3S_2$      | tyrosine-protein phosphatase non-receptor type 1     | 5-(4-chloro-5-phenyl-3-thienyl)-1,2,5-thiadiazolidin-3-one 1,1-dioxide                                   | 4.8         | 328.794 | 299      | {Wan et al., 2007}                 |
| 2are   | MAN       | $C_6H_{12}O_6$              | lectin                                               | alpha-d-mannose                                                                                          | 3.28        | 180.156 | 504      | {Buts et al., 2006}                |
| 2z4b   | DC8       | $C_{18}H_{16}F_2O_3$        | estrogen receptor beta                               | (3as,4r,9br)-2,2-difluoro-4-(4-hydroxyphenyl)-1,2,3,3a,4,9b-hexahydrocyclopenta[c]chromen-8-ol           | 9.36        | 318.315 | 514      | {Richardson et al., 2007}          |
| 2c94   | TSF       | $C_{15}H_{23}F_2N_3O_{10}P$ | 8,7-dimethyl-8-ribityllumazine synthase              | 3-(1,3,7-trihydro-9-d-ribityl-2,6,8-purinetrione-7-yl) 1,1 difluoropentane-1-phosphate                   | 6.82        | 488.334 | 800      | {Morgunova et al., 2006}           |
| 2b3f   | GAL       | $C_6H_{12}O_6$              | glucose-binding protein                              | beta-d-galactose                                                                                         | 6.03        | 180.156 | 2400     | {Cunco et al., 2006}               |
| 2bbf   | 344       | $C_8H_7N_3O$                | trna guanine transglycosylase                        | 6-amino-5,7-dihydro-imidazo[4,5-g]quinazolin-8-one                                                       | 5.1         | 201.185 | 386      | {Stengl et al., 2007}              |
| 2pwg   | CTS       | $C_8H_{15}NO_4$             | sucrose isomerase                                    | castanospermine                                                                                          | 4.82        | 189.209 | 1112     | {Ravaud et al., 2007}              |
| 2otz   | 1MR       | $C_7H_9N$                   | lysozyme                                             | n-methylaniline                                                                                          | 3.63        | 107.153 | 162      | {Mobley et al., 2007}              |
| 2ou0   | MR3       | $C_7H_7N$                   | lysozyme                                             | 1-methyl-1h-pyrrole                                                                                      | 3.23        | 81.116  | 162      | {Mobley et al., 2007}              |
| 2p2v   | IPH       | $C_6H_6O$                   | steroid delta-isomerase                              | phenol                                                                                                   | 3.87        | 94.111  | 524      | {Kraut et al., 2006}               |
| 2q88   | 4CS       | $C_6H_{10}N_6O_2$           | putative abc transporter amino acid-binding protein  | (4s)-2-methyl-1,4,5,6-tetrahydropyrimidine-4-carboxylic acid                                             | 5.8         | 142.156 | 257      | {Hanekep et al., 2007}             |
| 1u0    | URA       | $C_4H_4N_2O_2$              | uracil-dna glycosylase                               | uracil                                                                                                   | 7.06        | 112.087 | 205      | {Hoseki et al., 2003}              |
| 1uz1   | IFL       | $C_6H_{11}NO_4$             | beta-glucosidase a                                   | (3s,4r,5r)-3,4-dihydroxy-5-(hydroxymethyl)piperidin-2-one                                                | 6.89        | 161.156 | 936      | {Vincent et al., 2004}             |
| 1uz4   | IFL       | $C_6H_{11}NO_4$             | man5a                                                | (3s,4r,5r)-3,4-dihydroxy-5-(hydroxymethyl)piperidin-2-one                                                | 3.4         | 161.156 | 440      | {Vincent et al., 2004}             |
| 1v0l   | XIF-XYP   | $C_{10}H_{21}NO_7$          | endo-1,4-beta-xylanase a                             | piperidine-3,4-diol-beta-d-xylopyranose                                                                  | 6.32        | 267.276 | 313      | {Gloster et al., 2004}             |
| 1ws4   | AMG       | $C_7H_{14}O_6$              | agglutinin alpha chain                               | alpha-methyl-d-galactoside                                                                               | 3           | 194.182 | 612      | {Arockia Jeyaprakash et al., 2005} |
| 1y20   | IAC       | $C_8H_7NO_2$                | glutamate [mnda] receptor subunit zeta 1             | 1-aminocyclopropanecarboxylic acid                                                                       | 5.32        | 101.104 | 292      | {Inanobe et al., 2005}             |
| 2fai   | 459       | $C_{17}H_{23}O_7$           | estrogen receptor                                    | 4-[(1s,2s,5s,9r)-5-(hydroxymethyl)-8,9-dimethyl-3-oxabicyclo[3.3.1]non-7-en-2-yl]phenol                  | 6.24        | 276.371 | 540      | {Hsieh et al., 2006}               |
| 2fqw   | NOS       | $C_{10}H_{12}N_4O_5$        | membrane lipoprotein tmpc                            | inosine                                                                                                  | 6.68        | 268.226 | 318      | {Deka et al., 2006}                |
| 2j78   | GOX       | $C_6H_{12}N_2O_5$           | beta-glucosidase a                                   | (2s,3s,4r,5r)-6-(hydroxyamino)-2-(hydroxymethyl)-2,3,4,5-tetrahydropyridine-3,4,5-triol                  | 6.42        | 192.17  | 936      | {Gloster et al., 2007}             |
| 1bky   | 1MC       | $C_3H_7N_3O$                | vp39                                                 | 1-methylcytosine                                                                                         | 3.84        | 125.129 | 307      | {Hu et al., 1999}                  |
| 1q4w   | DOU       | $C_8H_8N_4O$                | queuine trna-ribosyltransferase                      | 2,6-diamino-3h-quinazolin-4-one                                                                          | 6.46        | 176.175 | 386      | {Brenk et al., 2004}               |
| 1fcx   | 184       | $C_{26}H_{28}O_5$           | retinoic acid receptor gamma-1                       | 6-hydroxy-(5,5,8,8-tetramethyl-5,6,7,8-tetrahydro-naphthalen-2-yl)-methyl]-naphthalene-2-carboxylic acid | 7.12        | 388.499 | 235      | {Klaholz et al., 2000}             |
| 1fh8   | XYP-XIF   | $C_{10}H_{21}NO_7$          | beta-1,4-xylanase                                    | beta-d-xylopyranose-piperidine-3,4-diol                                                                  | 6.89        | 267.276 | 312      | {Notenboom et al., 2000}           |
| 1y93   | HAE       | $C_7H_5NO_2$                | macrophage metalloelastase                           | acetoacetic acid                                                                                         | 2.1         | 75.067  | 159      | {Bertini et al., 2005}             |
| 1llw   | ESM       | $C_{19}H_{26}O_3$           | sex hormone-binding globulin                         | 1,3,5(10)-estratrien-2,3,17-beta-triol 2-methyl ether                                                    | 8.16        | 302.408 | 189      | {Avvakumov et al., 2002}           |
| 1fh9   | XYP-LOX   | $C_{10}H_{20}N_2O_5$        | beta-1,4-xylanase                                    | beta-d-xylopyranose-3,4,5-trihydroxy-piperidine-2-one-oxime                                              | 6.43        | 312.274 | 312      | {Notenboom et al., 2000}           |
| 1s9t   | QUS       | $C_8H_7N_3O_5$              | glutamate receptor, ionotropic kainate 2             | (s)-2-amino-3-(3,5-dioxo-[1,2,4]oxadiazolidin-2-yl)-propionic acid                                       | 6.6         | 189.126 | 518      | {Mayer, 2005}                      |
| 1fhd   | XYP-XIM   | $C_{12}H_{20}N_2O_8$        | beta-1,4-xylanase                                    | beta-d-xylopyranose-5,6,7,8-tetrahydro-imidazo[1,2-a]pyridine-6,7,8-triol                                | 6.82        | 320.296 | 312      | {Notenboom et al., 2000}           |
| 1lnm   | DTX       | $C_{23}H_{34}O_4$           | digal16                                              | digitoxigenin                                                                                            | 8.7         | 374.514 | 184      | {Korndörfer et al., 2003}          |
| 1nli   | ADE       | $C_4H_5N_5$                 | ribosome-inactivating protein alpha-trichosanthin    | adenine                                                                                                  | 3.59        | 135.127 | 248      | {Shaw et al., 2003}                |
| 1ow4   | 2AN       | $C_{16}H_{13}NO_3S$         | pheromone binding protein                            | 8-anilino-1-naphthalene sulfonate                                                                        | 5.68        | 299.344 | 258      | {Lartigou, 2003}                   |
| 1r5y   | DOU       | $C_8H_8N_4O$                | queuine trna-ribosyltransferase                      | 2,6-diamino-3h-quinazolin-4-one                                                                          | 6.46        | 176.175 | 386      | {Lartigou, 2003}                   |
| 1s38   | MAQ       | $C_8H_8N_3O$                | trna guanine transglycosylase                        | 2-amino-8-methylquinazolin-4(3h)-one                                                                     | 5.15        | 175.187 | 386      | {Meyer et al., 2004}               |
| 1s39   | AQO       | $C_8H_7N_3O$                | trna guanine transglycosylase                        | 2-aminoquinazolin-4(3h)-one                                                                              | 7.7         | 161.161 | 386      | {Meyer et al., 2004}               |
| 1sw1   | PBE       | $C_7H_{14}NO_2$             | ssmprotection protein (prox)                         | 1,1-dimethyl-prolinium                                                                                   | 7.3         | 144.192 | 550      | {Schieferer et al., 2004}          |

S 2 Table: CSAR summary data. A table showing the PDB IDs, gene names, protein and ligand information of the proteins in the 43 protein benchmark set derived from CSAR.
