# Supplementary material for: Fully Flexible Docking of Medium Sized Ligand Libraries with RosettaLigand
Source: PubMed Central journal article supplement (PMC4514752; doi:10.1371/journal.pone.0132508), 2015-07-24
Supplement: pone.0132508.s008.pdf [file pone.0132508.s008.pdf]

| PDB ID | Score of lowest scoring model |               | RMSD of lowest scoring model |               |
|--------|-------------------------------|---------------|------------------------------|---------------|
|        | TRANSROT/MCM                  | TRANSFORM/MCM | TRANSROT/MCM                 | TRANSFORM/MCM |
| 2q89   | -17.1                         | -16.1         | 1.0                          | 0.8           |
| 3bgz   | -15.8                         | -15.5         | 6.7                          | 4.5           |
| 1ukb   | -9.8                          | -10.4         | 4.3                          | 1.2           |
| 1vot   | -13.6                         | -13.6         | 4.0                          | 2.8           |
| 2p7g   | -16.5                         | -15.8         | 1.6                          | 0.8           |
| 2rca   | -14.8                         | -14.0         | 1.1                          | 1.1           |
| 2vuk   | -15.2                         | -14.2         | 2.2                          | 1.3           |
| 2nta   | -13.6                         | -15.6         | 1.0                          | 1.1           |
| 2are   | -11.7                         | -9.4          | 2.2                          | 1.4           |
| 2z4b   | -14.2                         | -13.2         | 2.3                          | 1.3           |
| 2jj3   | -18.9                         | -17.3         | 1.7                          | 3.8           |
| 2b3f   | -14.8                         | -13.3         | 2.7                          | 2.7           |
| 2bbf   | -17.0                         | -17.4         | 1.6                          | 1.9           |
| 2pwg   | -11.5                         | -12.9         | 2.4                          | 3.7           |
| 2otz   | -9.9                          | -11.0         | 1.0                          | 1.0           |
| 2ou0   | -9.2                          | -9.4          | 2.1                          | 0.9           |
| 2pzv   | -8.6                          | -7.6          | 3.1                          | 5.0           |
| 2q88   | -16.8                         | -16.7         | 1.4                          | 1.3           |
| 1ui0   | -8.8                          | -9.6          | 2.1                          | 2.2           |
| 1uz1   | -12.9                         | -9.8          | 3.3                          | 1.3           |
| 1uz4   | -11.4                         | -10.3         | 3.2                          | 1.8           |
| 1v0l   | -11.3                         | -11.1         | 2.6                          | 1.5           |
| 1ws4   | -9.6                          | -10.2         | 3.6                          | 3.7           |
| 1y20   | -14.7                         | -14.3         | 0.5                          | 0.4           |
| 2fai   | -14.9                         | -14.5         | 2.1                          | 1.8           |
| 2fqw   | -17.1                         | -15.2         | 2.2                          | 1.4           |
| 2j78   | -13.6                         | -12.7         | 3.9                          | 3.3           |
| 1bky   | -8.5                          | -9.4          | 4.4                          | 4.3           |
| 1q4w   | -14.6                         | -13.5         | 1.6                          | 1.2           |
| 1fcx   | -23.7                         | -22.2         | 1.4                          | 1.3           |
| 1fh8   | -11.0                         | -9.3          | 2.7                          | 1.9           |
| 1y93   | -6.9                          | -7.2          | 3.1                          | 1.7           |
| 1lhw   | -16.9                         | -15.1         | 3.3                          | 1.1           |
| 1fh9   | -12.9                         | -11.1         | 6.0                          | 5.9           |
| 1s9t   | -11.2                         | -10.5         | 4.9                          | 5.0           |
| 1fhd   | -13.0                         | -11.3         | 5.6                          | 3.5           |
| 1lnm   | -18.0                         | -17.3         | 5.2                          | 1.1           |
| 1nli   | -15.5                         | -13.9         | 1.0                          | 0.7           |
| 1ow4   | -16.2                         | -14.8         | 2.9                          | 1.3           |
| 1r5y   | -14.2                         | -14.3         | 1.2                          | 1.2           |
| 1s38   | -15.3                         | -15.0         | 1.3                          | 0.8           |
| 1s39   | -12.2                         | -11.9         | 1.4                          | 1.8           |
| 1sw1   | -13.5                         | -13.4         | 2.2                          | 1.9           |

S 3 Table: PDB IDs, RMSDs and Scores for lowest scoring models generated by the TRANSFORM/MCM and the TRANSROT/MCM protocols docking ligands into the set of 43 relaxed protein models.
